# Supplementary material for: A morpho-phylogenetic update on ixodid ticks infesting cattle and buffalos in Vietnam, with three new species to the fauna and a checklist of all species indigenous to the country
Source: Parasit Vectors. 2024 Jul 25;17:319. doi: 10.1186/s13071-024-06384-5 (PMC11282669; doi:10.1186/s13071-024-06384-5)
Supplement: Supplementary file 1 — Supplementary Material 1. [file 13071_2024_6384_MOESM1_ESM.pdf]

Supplementary Table 1. Data of tick collection from cattle, buffalo and dog.

| Tube No.     | Commune    | Coordinates                | District  | Province    | Host    | Date       | Rhipicephalus microplus |     |    |     | Rhipicephalus linnaei |   |   |   | Amblyomma integrum |   |   |   |
|--------------|------------|----------------------------|-----------|-------------|---------|------------|-------------------------|-----|----|-----|-----------------------|---|---|---|--------------------|---|---|---|
|              |            |                            |           |             |         |            | L                       | N   | M  | F   | L                     | N | M | F | L                  | N | M | F |
| 1            | Song Khua  | 20°55'55.3"N 104°52'30.0"E | Van Ho    | Son La      | Cattle  | 2023.01.10 |                         |     |    | 24  |                       |   |   |   |                    |   |   |   |
| 2            | Song Khua  | 20°55'55.3"N 104°52'30.0"E | Van Ho    | Son La      | Cattle  | 2023.01.10 |                         | 5   | 10 | 16  |                       |   |   |   |                    |   |   |   |
| 3            | Song Khua  | 20°55'55.3"N 104°52'30.0"E | Van Ho    | Son La      | Cattle  | 2023.01.10 |                         |     | 3  | 3   |                       |   |   |   |                    |   |   |   |
| 4            | Nam Man    | 21°04'55.9"N 103°33'59.5"E | Song Ma   | Son La      | Cattle  | 2023.04.20 |                         |     |    |     |                       |   |   |   |                    |   |   | 1 |
| 5 (NB 40 -2) | Nam Man    | 21°04'55.9"N 103°33'59.5"E | Song Ma   | Son La      | Cattle  | 2023.04.20 |                         |     |    |     |                       |   |   | 1 |                    |   |   |   |
| 6            | Nam Man    | 21°04'55.9"N 103°33'59.5"E | Song Ma   | Son La      | Cattle  | 2023.04.20 |                         |     |    |     |                       |   |   | 1 |                    |   |   |   |
| 7            | Song Khua  | 20°55'55.3"N 104°52'30.0"E | Van Ho    | Son La      | Cattle  | 2023.01.10 |                         |     | 1  | 1   |                       |   |   |   |                    |   |   |   |
| 8.1          | Song Khua  | 20°55'55.3"N 104°52'30.0"E | Van Ho    | Son La      | Cattle  | 2023.01.10 |                         |     |    | 5   |                       |   |   |   |                    |   |   |   |
| 8.2          | Song Khua  | 20°55'55.3"N 104°52'30.0"E | Van Ho    | Son La      | Cattle  | 2023.01.10 |                         |     |    | 5   |                       |   |   |   |                    |   |   |   |
| 9            | Nguyen Khe | 21°10'37.8"N 105°50'21.6"E | Dong Anh  | Ha Noi      | Cattle  | 2023.04.13 | 1                       | 25  | 9  | 30  |                       |   |   |   |                    |   |   |   |
| 10           | Bac Hong   | 21°10'42.1"N 105°48'19.3"E | Dong Anh  | Ha Noi      | Cattle  | 2023.04.14 |                         | 12  | 10 | 20  |                       |   |   |   |                    |   |   |   |
| 11           | Yen My     | 20°56'31.3"N 105°52'14.4"E | Thanh Tri | Ha Noi      | Cattle  | 2023.04.16 | 1                       |     | 1  | 70  |                       |   |   |   |                    |   |   |   |
| 11.2         | Yen My     | 20°56'31.3"N 105°52'14.4"E | Thanh Tri | Ha Noi      | Cattle  | 2023.04.16 |                         |     |    | 54  |                       |   |   |   |                    |   |   |   |
| 12           | Yen My     | 20°56'31.3"N 105°52'14.4"E | Thanh Tri | Ha Noi      | Cattle  | 2023.04.16 |                         | 15  | 91 | 10  |                       |   |   |   |                    |   |   |   |
| 13           | Yen My     | 20°56'31.3"N 105°52'14.4"E | Thanh Tri | Ha Noi      | Cattle  | 2023.04.16 |                         | 7   | 20 | 105 |                       |   |   |   |                    |   |   |   |
| 14           | Yen My     | 20°56'31.3"N 105°52'14.4"E | Thanh Tri | Ha Noi      | Cattle  | 2023.04.16 | 1                       |     |    | 2   |                       |   |   |   |                    |   |   |   |
| 15           | Yen My     | 20°56'31.3"N 105°52'14.4"E | Thanh Tri | Ha Noi      | Cattle  | 2023.04.16 |                         |     |    | 29  |                       |   |   |   |                    |   |   |   |
| 16           | Yen My     | 20°56'31.3"N 105°52'14.4"E | Thanh Tri | Ha Noi      | Cattle  | 2023.04.16 |                         | 2   | 5  |     |                       |   |   |   |                    |   |   |   |
| 17           | Yen My     | 20°56'31.3"N 105°52'14.4"E | Thanh Tri | Ha Noi      | Cattle  | 2023.04.16 |                         | 3   | 5  | 35  |                       |   |   |   |                    |   |   |   |
| 17.2         | Yen My     | 20°56'31.3"N 105°52'14.4"E | Thanh Tri | Ha Noi      | Cattle  | 2023.04.16 |                         |     |    | 15  |                       |   |   |   |                    |   |   |   |
| 18           | Yen My     | 20°56'31.3"N 105°52'14.4"E | Thanh Tri | Ha Noi      | Cattle  | 2023.04.16 |                         | 1   | 7  | 5   |                       |   |   |   |                    |   |   |   |
| 19.1         | Yen My     | 20°56'31.3"N 105°52'14.4"E | Thanh Tri | Ha Noi      | Cattle  | 2023.04.16 |                         |     |    | 8   |                       |   |   |   |                    |   |   |   |
| 19.2         | Yen My     | 20°56'31.3"N 105°52'14.4"E | Thanh Tri | Ha Noi      | Cattle  | 2023.04.16 |                         |     |    | 6   |                       |   |   |   |                    |   |   |   |
| 19.3         | Yen My     | 20°56'31.3"N 105°52'14.4"E | Thanh Tri | Ha Noi      | Cattle  | 2023.04.16 |                         |     |    | 18  |                       |   |   |   |                    |   |   |   |
| 19.4         | Yen My     | 20°56'31.3"N 105°52'14.4"E | Thanh Tri | Ha Noi      | Cattle  | 2023.04.16 |                         | 1   | 2  | 22  |                       |   |   |   |                    |   |   |   |
| 19.5         | Yen My     | 20°56'31.3"N 105°52'14.4"E | Thanh Tri | Ha Noi      | Cattle  | 2023.04.16 |                         |     |    | 8   |                       |   |   |   |                    |   |   |   |
| 20.1         | Bac Hong   | 21°10'42.1"N 105°48'19.3"E | Dong Anh  | Ha Noi      | Cattle  | 2023.04.14 |                         |     | 1  | 12  |                       |   |   |   |                    |   |   |   |
| 21.1         | Yen My     | 20°56'31.3"N 105°52'14.4"E | Thanh Tri | Ha Noi      | Cattle  | 2023.04.16 |                         |     |    | 10  |                       |   |   |   |                    |   |   |   |
| 21.2         | Yen My     | 20°56'31.3"N 105°52'14.4"E | Thanh Tri | Ha Noi      | Cattle  | 2023.04.16 |                         |     |    | 11  |                       |   |   |   |                    |   |   |   |
| 21.3         | Yen My     | 20°56'31.3"N 105°52'14.4"E | Thanh Tri | Ha Noi      | Cattle  | 2023.04.16 |                         |     |    | 13  |                       |   |   |   |                    |   |   |   |
| 21.4         | Yen My     | 20°56'31.3"N 105°52'14.4"E | Thanh Tri | Ha Noi      | Cattle  | 2023.04.16 |                         |     |    | 11  |                       |   |   |   |                    |   |   |   |
| 21.5         | Yen My     | 20°56'31.3"N 105°52'14.4"E | Thanh Tri | Ha Noi      | Cattle  | 2023.04.16 | 1                       | 6   | 35 | 54  |                       |   |   |   |                    |   |   |   |
| 21.6         | Yen My     | 20°56'31.3"N 105°52'14.4"E | Thanh Tri | Ha Noi      | Cattle  | 2023.04.16 |                         |     |    | 12  |                       |   |   |   |                    |   |   |   |
| 22.1         | Song Khua  | 20°55'55.3"N 104°52'30.0"E | Van Ho    | Son La      | Cattle  | 2023.01.10 |                         |     |    | 11  |                       |   |   |   |                    |   |   |   |
| 22.2         | Song Khua  | 20°55'55.3"N 104°52'30.0"E | Van Ho    | Son La      | Cattle  | 2023.01.10 |                         |     | 1  | 17  |                       |   |   |   |                    |   |   |   |
| 22.3         | Song Khua  | 20°55'55.3"N 104°52'30.0"E | Van Ho    | Son La      | Cattle  | 2023.01.10 |                         |     |    | 14  |                       |   |   |   |                    |   |   |   |
| 23           | Binh Long  | 21°39'40.9"N 106°11'34.9"E | Vo Nhai   | Thai Nguyen | Cattle  | 2022.12.26 |                         |     |    | 11  |                       |   |   |   |                    |   |   |   |
| 24           | Lien Hoa   | 20°59'44.6"N 104°51'30.7"E | Van Ho    | Son La      | Cattle  | 2023.01.11 |                         |     |    | 7   |                       |   |   |   |                    |   |   |   |
| 25           | Binh Long  | 21°39'40.9"N 106°11'34.9"E | Vo Nhai   | Thai Nguyen | Cattle  | 2022.12.26 |                         |     | 9  | 13  |                       |   |   |   |                    |   |   |   |
| 26           | Thuy Lam   | 21°10'39.9"N 105°53'23.2"E | Dong Anh  | Ha Noi      | Cattle  | 2022.12.21 |                         |     |    | 9   |                       |   |   |   |                    |   |   |   |
| 27           | Binh Long  | 21°39'40.9"N 106°11'34.9"E | Vo Nhai   | Thai Nguyen | Cattle  | 2022.12.26 |                         |     |    | 12  |                       |   |   |   |                    |   |   |   |
| 28           | Lien Hoa   | 20°59'44.6"N 104°51'30.7"E | Van Ho    | Son La      | Cattle  | 2023.01.11 |                         |     |    | 1   |                       |   |   |   |                    |   |   |   |
| 29           | Hop Thanh  | 21°45'30.5"N 105°39'22.4"E | Phu Luong | Thai Nguyen | Cattle  | 2023.03.29 | 3                       | 245 | 2  |     |                       | 1 |   |   |                    |   |   |   |
| 29.2         | Hop Thanh  | 21°45'30.5"N 105°39'22.4"E | Phu Luong | Thai Nguyen | Cattle  | 2023.03.29 |                         |     |    | 7   |                       |   |   |   |                    |   |   |   |
| 30.1         | Yen Lang   | 21°41'32.0"N 105°30'12.0"E | Dai Tu    | Thai Nguyen | Buffalo | 2023.04.01 |                         |     |    | 23  |                       |   |   |   |                    |   |   |   |
| 30.2         | Yen Lang   | 21°41'32.0"N 105°30'12.0"E | Dai Tu    | Thai Nguyen | Buffalo | 2023.04.01 |                         |     |    | 15  |                       |   |   |   |                    |   |   |   |
| 30.3         | Yen Lang   | 21°41'32.0"N 105°30'12.0"E | Dai Tu    | Thai Nguyen | Buffalo | 2023.04.01 |                         |     |    | 18  |                       |   |   |   |                    |   |   |   |
| 30.4         | Yen Lang   | 21°41'32.0"N 105°30'12.0"E | Dai Tu    | Thai Nguyen | Buffalo | 2023.04.01 |                         |     |    | 17  |                       |   |   |   |                    |   |   |   |
| 31           | Nguyen Khe | 21°10'37.8"N 105°50'21.6"E | Dong Anh  | Ha Noi      | Buffalo | 2023.04.13 |                         |     |    | 2   |                       |   |   |   |                    |   |   |   |
| 57           | Nguyen Khe | 21°10'37.8"N 105°50'21.6"E | Dong Anh  | Ha Noi      | Cattle  | 2023.04.13 | 1                       | 9   | 13 | 6   |                       |   |   |   |                    |   |   |   |

| Tube No. | Commune    | Coordinates                | District  | Province    | Host   | Date       | Rhipicephalus microplus |   |    |     | Rhipicephalus linnaei |   |    |    | Haemaphysalis cornigera |   |   |   |
|----------|------------|----------------------------|-----------|-------------|--------|------------|-------------------------|---|----|-----|-----------------------|---|----|----|-------------------------|---|---|---|
|          |            |                            |           |             |        |            | L                       | N | M  | F   | L                     | N | M  | F  | L                       | N | M | F |
| 11       | Tan Linh   | 21°07'28.8"N 105°23'15.5"E | Ba Vi     | Ha Noi      | Cattle | 2022.09.21 |                         |   |    | 3   |                       |   |    |    |                         |   |   |   |
| 12       | Tan Linh   | 21°04'40.1"N 105°25'31.3"E | Ba Vi     | Ha Noi      | Cattle | 2022.09.22 |                         |   | 1  | 3   |                       |   |    |    |                         |   |   |   |
| 13       | Tan Linh   | 21°12'40.5"N 105°27'23.5"E | Ba Vi     | Ha Noi      | Cattle | 2022.07.02 |                         |   |    | 2   |                       |   |    |    |                         |   |   |   |
| 14       | Tan Linh   | 21°12'40.5"N 105°27'23.5"E | Ba Vi     | Ha Noi      | Cattle | 2022.07.02 |                         |   |    | 2   |                       |   |    |    |                         |   |   |   |
| 15       | Muong Hung | 20°56'39.8"N 103°52'33.9"E | Song Ma   | Son La      | Cattle | 2022.07.07 |                         |   |    | 33  |                       |   |    |    |                         |   |   | 2 |
| 16       | Tan Linh   | 21°12'40.5"N 105°27'23.5"E | Ba Vi     | Ha Noi      | Cattle | 2022.07.02 |                         | 2 | 12 | 68  |                       |   |    |    |                         |   |   |   |
| 17       | Minh Chau  | 21°12'40.5"N 105°27'23.5"E | Ba Vi     | Ha Noi      | Cattle | 2022.07.02 |                         |   |    | 4   |                       |   |    |    |                         |   |   |   |
| 18       | Minh Chau  | 21°12'40.5"N 105°27'23.5"E | Ba Vi     | Ha Noi      | Cattle | 2022.07.02 |                         |   |    | 3   |                       |   |    |    |                         |   |   |   |
| 19       | Van Hoa    | 21°12'40.5"N 105°27'23.5"E | Ba Vi     | Ha Noi      | Cattle | 2022.07.02 |                         | 5 | 4  | 9   |                       |   | 1  |    |                         |   |   |   |
| 20       | Van Hoa    | 21°12'40.5"N 105°27'23.5"E | Ba Vi     | Ha Noi      | Cattle | 2022.07.02 |                         |   |    | 7   |                       |   |    |    |                         |   |   |   |
| 21       | Dong Thinh | 21°52'35.0"N 105°35'48.0"E | Dinh Hoa  | Thai Nguyen | Dog    | 2022.07.13 |                         |   |    |     |                       | 3 | 43 | 25 |                         |   |   |   |
| 26       | Yen My     | 20°56'31.3"N 105°52'14.4"E | Thanh Tri | Ha Noi      | Cattle | 2022.07.02 |                         |   |    | 36  |                       |   |    |    |                         |   |   |   |
| 27       | Linh Thong | 22°01'07.0"N 105°40'00.0"E | Dinh Hoa  | Thai Nguyen | Cattle | 2022.07.13 | 2                       | 3 | 34 | 114 |                       |   |    |    |                         |   |   |   |
| 28       | Minh Chau  | 21°12'40.5"N 105°27'23.5"E | Ba Vi     | Ha Noi      | Cattle | 2022.07.02 |                         |   |    | 1   |                       |   |    |    |                         |   |   |   |
